# Supplementary material for: Two fluoroalcohols as components of basic buffers for liquid chromatography electrospray ionization mass spectrometric determination of antibiotic residues
Source: Royal Society of Chemistry journal article supplement (doi:10.1039/c1an15123a), 2011-01-01
Supplement: c1an15123a.pdf [file c1an15123a.pdf]

Table 1. ESI-MS compatible (volatile) buffer components recommended for Waters XBridge Columns at high pH by Waters.

| Additive/Buffer                 | pKa                                   | Buffer range | Recommended concentration |
|---------------------------------|---------------------------------------|--------------|---------------------------|
| 4-Methylmorpholine              | ~8.4                                  | 7.4-9.4      | 10 mM or less             |
| Ammonia (NH <sub>4</sub> OH)    | 9.2                                   | 8.2-10.2     | Below 10 mM               |
| Ammonium Bicarbonate            | 10.3 (HCO <sub>3</sub> <sup>-</sup> ) | 6.8-11.3     | 5-10 mM range             |
|                                 | 9.2 (NH <sub>4</sub> <sup>+</sup> )   |              |                           |
| Ammonium (Acetate)              | 9.2                                   | 8.2-10.2     | 1-10 mM range             |
| Ammonium (Formate)              | 9.2                                   | 8.2-10.2     | 1-10 mM range             |
| 1-Methylpiperidine              | 10.2                                  | 9.3-11.3     | 1-10 mM range             |
| Triethylamine (as acetate salt) | 10.7                                  | 9.7-11.7     | 0.1-1.0 % range           |
| Pyrrolidine                     | 11.3                                  | 10.3-12.3    | -                         |
