# Supplementary material for: Two fluoroalcohols as components of basic buffers for liquid chromatography electrospray ionization mass spectrometric determination of antibiotic residues
Source: Royal Society of Chemistry journal article supplement (doi:10.1039/c1an15123a), 2011-01-01
Supplement: c1an15123a_2.pdf [file c1an15123a_2.pdf]

**Table 3. Comparison of antibiotic separation and ESI signal intensity using different buffers.**

| Buffer solution                         | Concentration of an analyte |      |          |         |                    |                    |                    |                    |                  |       |
|-----------------------------------------|-----------------------------|------|----------|---------|--------------------|--------------------|--------------------|--------------------|------------------|-------|
|                                         | 1 µg/mL                     |      |          |         |                    | 10 µg/mL           |                    |                    |                  |       |
|                                         | c [mM]                      | pH   | tR [min] | Analyte | Peak height (+ESI) | Peak height (-ESI) | Peak height (+ESI) | Peak height (-ESI) | Peak Width [min] | Symm. |
| AAF 2.8                                 | 1                           | 2.8  | 18.9     | OFL     | $6.8 \times 10^7$  | $6.9 \times 10^3$  | $6.6 \times 10^8$  | $1.8 \times 10^5$  |                  |       |
|                                         |                             |      | 19.8     | *NOR    | $3.2 \times 10^7$  |                    | $4.0 \times 10^8$  | $6.6 \times 10^4$  |                  |       |
|                                         |                             |      | 20.3     | *CIP    | $4.0 \times 10^7$  |                    | $3.7 \times 10^8$  | $5.7 \times 10^4$  |                  |       |
|                                         |                             |      | 20.3     | *SMX    | $2.9 \times 10^7$  | $1.8 \times 10^5$  | $1.5 \times 10^8$  | $2.5 \times 10^6$  |                  |       |
|                                         |                             |      | 26.1     | SDM     | $6.0 \times 10^7$  | $7.9 \times 10^5$  | $3.9 \times 10^8$  | $5.7 \times 10^6$  | 0.5333           | 1.3   |
| TEAA 10.0                               | 5                           | 10   | 12.1     | SMX     |                    | $7.7 \times 10^4$  |                    | $7.6 \times 10^5$  | 0.1867           | 0.47  |
|                                         |                             |      | 19.6     | SDM     | $2.1 \times 10^5$  | $2.1 \times 10^5$  | $2.1 \times 10^6$  | $2.2 \times 10^6$  | 0.1956           | 0.57  |
|                                         |                             |      | 20.9     | *NOR    | $4.6 \times 10^5$  | $1.2 \times 10^4$  | $4.5 \times 10^6$  | $1.1 \times 10^5$  |                  |       |
|                                         |                             |      | 21.2     | *CIP    | $3.6 \times 10^5$  | $1.5 \times 10^4$  | $3.6 \times 10^6$  | $1.4 \times 10^5$  |                  |       |
|                                         |                             |      | 34.5     | OFL     | $5.9 \times 10^5$  | $7.8 \times 10^4$  | $6.0 \times 10^6$  | $8.0 \times 10^5$  | 0.2356           | 0.59  |
| HFTB/NH <sub>4</sub> OH 9.0             | 5                           | 9.0  | 4.1      | SMX     | $4.1 \times 10^7$  | $1.2 \times 10^5$  | $2.1 \times 10^7$  | $2.6 \times 10^5$  | 0.2              | 1.25  |
|                                         |                             |      | 7.5      | SDM     | $1.5 \times 10^7$  | $5.2 \times 10^5$  | $1.4 \times 10^8$  | $2.0 \times 10^6$  | 0.2              | 1.8   |
|                                         |                             |      | 8.9      | NOR     | $7.6 \times 10^6$  | $1.6 \times 10^4$  | $9.4 \times 10^7$  | $2.1 \times 10^5$  | 0.2111           | 1.18  |
|                                         |                             |      | 10.3     | CIP     | $1.4 \times 10^7$  | $1.9 \times 10^4$  | $2.0 \times 10^8$  | $3.2 \times 10^5$  | 0.1644           | 1.16  |
|                                         |                             |      | 16.5     | OFL     | $4.7 \times 10^7$  | $5.8 \times 10^4$  | $5.1 \times 10^8$  | $9.9 \times 10^5$  | 0.1633           | 1.61  |
| HFIP/TEA 9.0                            | 5                           | 9.0  | 4.4      | SMX     |                    | $3.8 \times 10^4$  |                    | $3.2 \times 10^5$  | 0.1533           | 1.34  |
|                                         |                             |      | 8.6      | SDM     | $1.5 \times 10^6$  | $4.5 \times 10^5$  | $5.1 \times 10^6$  | $1.5 \times 10^6$  | 0.1833           | 1.04  |
|                                         |                             |      | 10.8     | NOR     | $2.8 \times 10^6$  |                    | $1.1 \times 10^7$  | $1.7 \times 10^5$  | 0.2467           | 1.23  |
|                                         |                             |      | 12       | CIP     | $4.8 \times 10^6$  |                    | $1.4 \times 10^7$  | $2.6 \times 10^5$  | 0.2378           | 1.12  |
|                                         |                             |      | 18.9     | OFL     |                    |                    | $1.2 \times 10^7$  | $1.9 \times 10^6$  | 0.2244           | 1.61  |
| CH <sub>3</sub> COONH <sub>4</sub> 10.0 | 5                           | 10.0 | 7.8      | SMX     | $8.8 \times 10^5$  | $9.5 \times 10^4$  | $1.9 \times 10^7$  | $5.0 \times 10^5$  | 0.3933           | 1.47  |
|                                         |                             |      | 12.2     | *SDM    | $5.7 \times 10^6$  | $1.5 \times 10^6$  | $1.4 \times 10^8$  | $3.6 \times 10^6$  | 0.1667           | 1.56  |
|                                         |                             |      | 12.4     | *NOR    | $5.6 \times 10^6$  | $3.1 \times 10^4$  | $5.1 \times 10^7$  | $1.5 \times 10^5$  | 0.1833           | 1.01  |
|                                         |                             |      | 13.9     | CIP     | $7.6 \times 10^6$  | $3.2 \times 10^4$  | $7.3 \times 10^7$  | $2.0 \times 10^5$  | 0.1622           | 1.13  |
|                                         |                             |      | 21.2     | OFL     | $2.2 \times 10^7$  | $6.3 \times 10^4$  | $2.3 \times 10^8$  | $5.9 \times 10^5$  | 0.1583           | 1.52  |

\* Overlapping peaks.

|                                        |   |      |      |      |                       |                       |                       |                       |        |      |
|----------------------------------------|---|------|------|------|-----------------------|-----------------------|-----------------------|-----------------------|--------|------|
| CH <sub>3</sub> COONH <sub>4</sub> 9.0 | 5 | 9.0  | 7.8  | SMX  | 2.5 x 10 <sup>6</sup> | 1.8 x 10 <sup>5</sup> | 1.1 x 10 <sup>7</sup> | 5.5 x 10 <sup>5</sup> | 0.2756 | 1.29 |
|                                        |   |      | 12.4 | SDM  | 1.8 x 10 <sup>7</sup> | 1.1 x 10 <sup>6</sup> | 6.5 x 10 <sup>7</sup> | 3.6 x 10 <sup>6</sup> | 0.1467 | 0.77 |
|                                        |   |      | 14.8 | NOR  | 3.7 x 10 <sup>6</sup> | 8.0 x 10 <sup>3</sup> | 7.7 x 10 <sup>7</sup> | 2.2 x 10 <sup>5</sup> | 0.1889 | 0.36 |
|                                        |   |      | 15.3 | CIP  | 6.3 x 10 <sup>6</sup> | 9.0 x 10 <sup>3</sup> | 6.0 x 10 <sup>7</sup> | 2.6 x 10 <sup>5</sup> | 0.1778 | 0.45 |
|                                        |   |      | 22.8 | OFL  | 2.5 x 10 <sup>7</sup> | 2.8 x 10 <sup>4</sup> | 2.8 x 10 <sup>8</sup> | 1.0 x 10 <sup>6</sup> | 0.1822 | 0.55 |
| 1-MePip 9.85                           | 5 | 9.85 | 11.3 | SMX  |                       | 4.7 x 10 <sup>4</sup> |                       | 3.8 x 10 <sup>5</sup> | 0.1844 | 0.66 |
|                                        |   |      | 16.2 | SDM  |                       | 3.2 x 10 <sup>5</sup> | 5.4 x 10 <sup>6</sup> | 2.3 x 10 <sup>6</sup> | 0.1667 | 0.52 |
|                                        |   |      | 17.0 | *NOR |                       |                       | 9.2 x 10 <sup>4</sup> | 6.5 x 10 <sup>4</sup> | 0.2333 | 0.28 |
|                                        |   |      | 17.2 | *CIP |                       |                       | 4.3 x 10 <sup>6</sup> | 2.7 x 10 <sup>6</sup> |        |      |
|                                        |   |      | 23.5 | OFL  |                       |                       | 4.8 x 10 <sup>6</sup> | 5.9 x 10 <sup>5</sup> | 0.1467 | 0.53 |
| HFTB/NH <sub>4</sub> OH<br>10.0        | 5 | 10.0 | 5.6  | SMX  | 6.7 x 10 <sup>4</sup> | 1.4 x 10 <sup>3</sup> | 2.2 x 10 <sup>5</sup> | 3.2 x 10 <sup>4</sup> | 0.305  | -    |
|                                        |   |      | 9.8  | *SDM | 1.9 x 10 <sup>5</sup> | 1.9 x 10 <sup>4</sup> | 1.0 x 10 <sup>6</sup> | 1.2 x 10 <sup>5</sup> | 0.1781 | 1.63 |
|                                        |   |      | 10.3 | *NOR | 1.7 x 10 <sup>5</sup> | 4.1 x 10 <sup>3</sup> | 1.3 x 10 <sup>6</sup> | 3.7 x 10 <sup>4</sup> | 0.3267 | 1.03 |
|                                        |   |      | 11.6 | CIP  | 2.5 x 10 <sup>5</sup> | 6.3 x 10 <sup>3</sup> | 1.1 x 10 <sup>6</sup> | 6.4 x 10 <sup>4</sup> | 0.34   | 1.16 |
|                                        |   |      | 18   | OFL  | 7.7 x 10 <sup>5</sup> | 2.9 x 10 <sup>4</sup> | 8.5 x 10 <sup>6</sup> | 1.9 x 10 <sup>5</sup> | 0.3133 | 1.53 |
| HFIP/NH <sub>4</sub> OH 10.0           | 5 | 10.0 | 5.2  | SMX  | 6.9 x 10 <sup>4</sup> | 2.0 x 10 <sup>3</sup> | 2.8 x 10 <sup>5</sup> | 3.1 x 10 <sup>4</sup> | 0.2633 | -    |
|                                        |   |      | 9    | SDM  | 3.7 x 10 <sup>5</sup> | 1.6 x 10 <sup>4</sup> | 1.4 x 10 <sup>6</sup> | 9.4 x 10 <sup>4</sup> | 0.2717 | 1.63 |
|                                        |   |      | 10.1 | NOR  | 3.3 x 10 <sup>5</sup> | 3.9 x 10 <sup>3</sup> | 1.7 x 10 <sup>6</sup> | 2.4 x 10 <sup>4</sup> | 0.4233 | 1.04 |
|                                        |   |      | 11.3 | CIP  | 5.4 x 10 <sup>5</sup> | 5.5 x 10 <sup>3</sup> | 3.9 x 10 <sup>6</sup> | 3.8 x 10 <sup>4</sup> | 0.3    | 1.17 |
|                                        |   |      | 18.4 | OFL  | 1.6 x 10 <sup>6</sup> | 1.4 x 10 <sup>4</sup> | 1.1 x 10 <sup>7</sup> | 1.4 x 10 <sup>5</sup> | 0.4167 | 1.62 |
| HFIP/NH <sub>4</sub> OH 9.0            | 5 | 9.0  | 4.5  | SMX  | 4.4 x 10 <sup>6</sup> | 1.4 x 10 <sup>5</sup> | 3.4 x 10 <sup>7</sup> | 5.6 x 10 <sup>5</sup> | 0.2044 | 1.01 |
|                                        |   |      | 8.2  | SDM  | 1.8 x 10 <sup>7</sup> | 1.2 x 10 <sup>6</sup> | 1.6 x 10 <sup>8</sup> | 3.8 x 10 <sup>6</sup> | 0.2067 | 0.8  |
|                                        |   |      | 9.9  | NOR  | 1.0 x 10 <sup>7</sup> | 3.3 x 10 <sup>4</sup> | 1.1 x 10 <sup>8</sup> | 5.5 x 10 <sup>5</sup> | 0.2156 | 0.4  |
|                                        |   |      | 11.1 | CIP  | 1.9 x 10 <sup>7</sup> | 5.7 x 10 <sup>4</sup> | 2.0 x 10 <sup>8</sup> | 6.1 x 10 <sup>5</sup> | 0.1822 | 0.46 |
|                                        |   |      | 18.6 | OFL  | 3.9 x 10 <sup>7</sup> | 1.1 x 10 <sup>5</sup> | 4.3 x 10 <sup>8</sup> | 4.1 x 10 <sup>6</sup> | 0.1867 | 0.57 |

\* Overlapping peaks.

|                             |    |     |      |      |                       |                       |                       |                       |        |      |
|-----------------------------|----|-----|------|------|-----------------------|-----------------------|-----------------------|-----------------------|--------|------|
| HFIP/NH <sub>4</sub> OH 9.0 | 1  | 9.0 | 3.7  | SMX  | 2.3 x 10 <sup>5</sup> | 1.0 x 10 <sup>4</sup> | 6.5 x 10 <sup>5</sup> | 9.1 x 10 <sup>4</sup> | 0.14   | -    |
|                             |    |     | 6    | SDM  | 2.5 x 10 <sup>5</sup> | 3.7 x 10 <sup>4</sup> | 1.7 x 10 <sup>6</sup> | 1.6 x 10 <sup>5</sup> | 0.3444 | 1.5  |
|                             |    |     | 10   | *NOR | 1.3 x 10 <sup>5</sup> | 2.1 x 10 <sup>3</sup> | 8.2 x 10 <sup>5</sup> | 3.5 x 10 <sup>4</sup> | 0.73   | 1.44 |
|                             |    |     | 10.5 | *CIP | 1.4 x 10 <sup>5</sup> | 3.5 x 10 <sup>3</sup> | 1.4 x 10 <sup>6</sup> | 5.5 x 10 <sup>4</sup> | 0.5133 | 1.11 |
|                             |    |     | 17.4 | OFL  | 4.0 x 10 <sup>5</sup> | 1.8 x 10 <sup>4</sup> | 8.4 x 10 <sup>6</sup> | 1.8 x 10 <sup>5</sup> | 0.68   | 1.66 |
| HFIP/NH <sub>4</sub> OH 9.0 | 10 | 9.0 | 4.6  | SMX  | 9.8 x 10 <sup>5</sup> | 2.7 x 10 <sup>3</sup> | 3.4 x 10 <sup>5</sup> | 4.9 x 10 <sup>4</sup> | 0.2567 | -    |
|                             |    |     | 8.2  | SDM  | 2.7 x 10 <sup>5</sup> | 1.7 x 10 <sup>4</sup> | 1.6 x 10 <sup>6</sup> | 2.0 x 10 <sup>5</sup> | 0.33   | 1.83 |
|                             |    |     | 10.1 | NOR  | 2.5 x 10 <sup>5</sup> | 3.2 x 10 <sup>3</sup> | 1.5 x 10 <sup>6</sup> | 2.8 x 10 <sup>4</sup> | 0.64   | 1.19 |
|                             |    |     | 11.6 | CIP  | 3.1 x 10 <sup>5</sup> | 5.5 x 10 <sup>3</sup> | 3.1 x 10 <sup>6</sup> | 4.8 x 10 <sup>4</sup> | 0.5067 | 1.16 |
|                             |    |     | 19.3 | OFL  | 1.9 x 10 <sup>6</sup> | 3.2 x 10 <sup>4</sup> | 1.8 x 10 <sup>7</sup> | 1.2 x 10 <sup>5</sup> | 0.4867 | 1.67 |

\* Overlapping peaks.
